# Supplementary material for: Integrin-associated transcriptional characteristics of circulating tumor cells in breast cancer patients
Source: PeerJ. 2024 Jan 18;12:e16678. doi: 10.7717/peerj.16678 (PMC10800097; doi:10.7717/peerj.16678)
Supplement: Supplemental Information 2 [file peerj-12-16678-s002.xlsx]

## Sheet: CTCs_integrin B4
	Site of distant metastasis	Molecular-genetic subtype	B4+	CD45- EpCAM+ stem by CD44+CD24-	B4+	CD45- EpCAM+ non-stem by CD44+CD24-	B4+	CD45- EpCAM+ CD133+	B4+	CD45- EpCAM+ CD133-	B4+	CD45- EpCAM+ ALDH+	B4+	CD45- EpCAM+ ALDH-	B4+	CD45- EpCAM+ N-cadh+	B4+	CD45- EpCAM+ N-cadh-	B4+
Patient 1	liver, bones	Lum B(Her2+)	86.32		3.32		83		19.09		67.23		86.32		0		69.72		16.6
Patient 2	lungs	Lum B(Her2-)	4.15		0		4.15		0.83		3.32		4.15		0		0.83		3.32
Patient 3	no	LumA	0		0		0		0		0		0		0		0		0
Patient 4	no	LumB (Her2-)	0		0		0		0		0		0		0		0		0
Patient 5	no	LumB (Her2-)	3.32		0		3.32		0		3.32		3.32		0		0		3.32
Patient 6	no	Lum B (Her2+)	0		0		0		0		0		0		0		0		0
Patient 7	no	Lum B (Her2+)	2.49		0		2.49		0.83		1.66		0		2.49		0.83		1.66
Patient 8	no	Lum B (Her2+)	4.98		0.83		4.15		2.49		2.49		4.98		0		3.32		1.66
Patient 9	no	LumB (Her2-)	0		0		0		0		0		0		0		0		0
Patient 10	no	LumA	4.15		0		4.15		0		4.15		3.32		0.83		3.32		0.83
Patient 11	liver, bones	Lum B(Her2-)	4.15		0		4.15		0		4.15		0		4.15		1.66		2.49
Patient 12	no	LumB (Her2-)	0		0		0		0		0		0		0		0		0
Patient 13	no	LumA	0.83		0.83		0		0.83		0		0.83		0		0.83		0
Patient 14	no	LumA	0		0		0		0		0		0		0		0		0
Patient 15	brain	LumB (Her2-)	11.62		0		11.62		4.98		6.64		11.62		0		9.96		1.66
Patient 16	no	Her2+	0		0		0		0		0		0		0		0		0
Patient 17	liver, bones	Her2+	0		0		0		0		0		0		0		0		0
Patient 18	no	Lum B (Her2+)	17.43		0		17.43		16.6		0.83		17.43		0		16.6		0.83
Patient 19	no	LumB (Her2-)	0.83		0		0.83		0.83		0		0.83		0		0		0.83
Patient 20	liver	LumB (Her2+)	4.98		0		4.98		3.32		1.66		0.83		4.15		0.83		4.15
Patient 21	no	LumA	1.66		0		1.66		0.83		0.83		0.83		0.83		0		1.66
Patient 22	no	LumB (Her2-)	3.32		2.49		0.83		0		3.32		3.32		0		0.83		2.49
Patient 23	no	LumA	4.98		0		4.98		0.83		4.15		0		4.98		1.66		3.32
Patient 24	bones	LumB (Her2-)	17.43		3.32		14.11		13.28		4.15		7.47		9.96		8.3		9.13
Patient 25	liver, bones	LumB (Her2-)	1.66		0		1.66		0		1.66		0.83		0.83		0.83		0.83
Patient 26	no	TN	0.83		0.83		0		0.83		0		0.83		0		0.83		0
Patient 27	lungs	LumB (Her2-)	0		0		0		0		0		0		0		0		0
Patient 28	no	TN	16.6		0		16.6		0		16.6		13.28		3.32		1.66		14.94
Patient 29	no	LumB (Her2-)	0.83		0		0.83		0		0.83		0		0.83		0		0.83
Patient 30	bones	Lum A/B(Her2-)	15.77		2.49		13.28		0		15.77		4.15		11.62		9.96		5.81
Patient 31	no	LumA	2.49		0		2.49		0.83		1.66		0.83		1.66		2.49		0
Patient 32	no	LumA	2.49		0.83		1.66		0.83		1.66		1.66		0.83		0.83		1.66
Patient 33	no	LumB (Her2-)	4.15		0		4.15		0		4.15		4.15		0		0.83		3.32
Patient 34	no	LumA	0		0		0		0		0		0		0		0		0
Patient 35	no	TN	1.66		0		1.66		0		1.66		0		1.66		1.66		0
Patient 36	no	TN	1.68		0		1.68		0.56		1.12		0.56		1.12		0		1.68
Patient 37	no		4.98		2.49		2.49		0.83		4.15		4.98		0		0		4.98
Patient 38	liver, bones	TN	28.22		0		28.22		26.56		1.66		28.22		0		26.56		1.66
Patient 39	no	LumB (Her2-)	0		0		0		0		0		0		0		0		0
