# Supplementary material for: Integrin-associated transcriptional characteristics of circulating tumor cells in breast cancer patients
Source: PeerJ journal article supplement (doi:10.7717/peerj.16678), 2024-01-18
Supplement: Supplementary_Tables.pdf [file Supplementary_Tables.pdf]

Supplementary Table 1. Clinicopathological characteristics of breast cancer patients

| Cases | Age at diagnosis (yr) | Grade | TNM    | Focality | Molecular subtype | ER | PR | HER2       | Ki-67 (%) | Neoadjuvant chemotherapy |
|-------|-----------------------|-------|--------|----------|-------------------|----|----|------------|-----------|--------------------------|
| 1     | 37                    | 3     | T2N2M0 | UF       | TN                | -  | +  | 0          | 80        | Yes                      |
| 2     | 50                    | 3     | T2N0M0 | MF       | Lum B HER2-       | +  | +  | 1+         | 38        | No                       |
| 3     | 53                    | 2     | T1N0M0 | MF       | TN                | -  | -  | 0          | 87        | No                       |
| 4     | 64                    | 2     | T2N1M0 | UF       | Lum B HER2-       | +  | +  | 1+         | 30        | No                       |
| 5     | 64                    | 2     | T2N0M0 | UF       | Lum B HER2+       | +  | +  | 3+         | 21        | Yes                      |
| 6     | 56                    | 1     | T4N3M0 | UF       | Lum B HER2-       | +  | -  | 1+         | 42        | No                       |
| 7     | 44                    | 2     | T2N1M0 | UF       | Lum B HER2-       | +  | +  | 0          | 20        | No                       |
| 8     | 58                    | 3     | T4N1M0 | UF       | TN                | -  | -  | 2+ (FISH-) | 52        | Yes                      |
| 9     | 48                    | 3     | T2N2M0 | UF       | TN                | -  | -  | 0          | 36        | Yes                      |
| 10    | 58                    | 2     | T2N1M0 | UF       | Lum B HER2-       | +  | +  | 1+         | 43        | No                       |
| 11    | 71                    | 3     | T2N1M0 | UF       | Lum B HER2-       | +  | 0  | 0          | 85        | No                       |
| 12    | 76                    | 1     | T2NxM0 | UF       | Lum A HER2-       | +  | +  | 1+         | 7         | No                       |
| 13    | 45                    | 2     | T2N0M0 | UF       | Lum A HER2-       | +  | +  | 1+         | 14        | No                       |
| 14    | 60                    | 2     | T3N1M0 | UF       | Lum B HER2-       | +  | +  | 0          | 32        | ND                       |
| 15    | 62                    | 1     | T2N1M0 | UF       | Lum B HER2-       | +  | +  | 0          | 44        | Yes                      |
| 16    | 36                    | 2     | T2NxM0 | MF       | Lum B HER2-       | +  | +  | 0          | 35        | Yes                      |
| 17    | 45                    | 2     | T2N0M0 | UF       | TN                | -  | -  | 0          | 77        | Yes                      |
| 18    | 68                    | 3     | T2NxMx | UF       | Lum B HER2-       | +  | 0  | -          | 33        | Yes                      |
| 19    | 60                    | 1     | T2N0M0 | UF       | Lum B HER2-       | +  | +  | 2+ (FISH-) | 38        | No                       |
| 20    | 55                    | 2     | T4N1M0 | UF       | HER2+             | -  | -  | 3+         | 18        | Yes                      |

UF, unifocal; MF, multifocal; Lum, luminal; TN, triple-negative; yr, years; ER, estrogen receptors; PR, progesterone receptors; TNM, tumor-node-metastasis classification; "+", presence; "-", absence; FISH, fluorescence in situ hybridization

Supplementary Table 2. Expression of stemness/EMT and proliferation genes in CTCs of breast cancer patients

|                                                                                                              | <i>CD133/<br/>PROM1</i>        | <i>ALDH1A1</i>                    | <i>CD44/<br/>CD24</i> | <i>SNAI1</i>     | <i>SNAI2</i>    | <i>KLF4</i>                    | <i>OCT4/<br/>POU5F1</i>          | <i>MYC</i>                       | <i>CDH1</i>       | <i>CDH2</i>                    | <i>VIM</i>                     | <i>ZEB1</i>                       | <i>ZEB2</i>                        | <i>MKI67</i>                    |
|--------------------------------------------------------------------------------------------------------------|--------------------------------|-----------------------------------|-----------------------|------------------|-----------------|--------------------------------|----------------------------------|----------------------------------|-------------------|--------------------------------|--------------------------------|-----------------------------------|------------------------------------|---------------------------------|
| 1. CTCs expressing isolated integrin subunits, n=143                                                         | 1/143<br>(0.7%)                | 0/143<br>(0.0%)                   | 13/143<br>(9.1%)      | 0/143<br>(0.0%)  | 0/143<br>(0.0%) | 1/143<br>(0.7%)                | 0/143<br>(0.0%)                  | 0/143<br>(0.0%)                  | 16/143<br>(11.2%) | 0/143<br>(0.0%)                | 56/143<br>(39.2%)              | 3/143<br>(2.1%)                   | 39/143<br>(27.3%)                  | 0/143<br>(0.0%)                 |
| 2. CTCs expressing isolated integrin $\alpha$ -subunits, n=81                                                | 1/81<br>(1.2%)                 | 2/81<br>(2.5%)                    | 16/81<br>(19.8%)      | 1/81<br>(1.2%)   | 0/81<br>(0.0%)  | 2/81<br>(2.5%)                 | 0/81<br>(0.0%)                   | 0/81<br>(0.0%)                   | 7/81<br>(8.6%)    | 0/81<br>(0.0%)                 | 38/81<br>(46.9%)               | 2/81<br>(2.5%)                    | 30/81<br>(37.0%)<br><b>p=0.008</b> | 1/81<br>(1.2%)                  |
| 3. CTCs expressing different heterodimers containing $\beta$ 1-subunit without other $\beta$ -subunits, n=8  | 0/8<br>(0.0%)                  | 1/8<br>(12.5%)<br><b>p=0.043*</b> | 1/8<br>(12.5%)        | 0/8<br>(0.0%)    | 0/8<br>(0.0%)   | 1/8<br>(12.5%)                 | 1/8<br>(12.5%)<br><b>p=0.043</b> | 0/8<br>(0.0%)                    | 1/8<br>(12.5%)    | 0/8<br>(0.0%)                  | 3/8<br>(37.5%)                 | 0/8<br>(0.0%)                     | 3/8<br>(37.5%)                     | 1/8<br>(12.5%)                  |
| 4. CTCs expressing different heterodimers containing $\beta$ 2-subunit without other $\beta$ -subunits, n=2  | 0/2<br>(0.0%)                  | 0/2<br>(0.0%)                     | 1/2<br>(50.0%)        | 0/2<br>(0.0%)    | 0/2<br>(0.0%)   | 0/2<br>(0.0%)                  | 0/2<br>(0.0%)                    | 0/2<br>(0.0%)                    | 1/2<br>(50.0%)    | 0/2<br>(0.0%)                  | 2/2<br>(100.0%)                | 0/2<br>(0.0%)                     | 2/2<br>(100.0%)<br><b>p=0.042</b>  | 0/2<br>(0.0%)                   |
| 5. CTCs expressing different heterodimers containing $\beta$ 3-subunit without other $\beta$ -subunits, n=11 | 0/11<br>(0.0%)                 | 0/11<br>(0.0%)                    | 0/11<br>(0.0%)        | 0/11<br>(0.0%)   | 0/11<br>(0.0%)  | 0/11<br>(0.0%)                 | 0/11<br>(0.0%)                   | 0/11<br>(0.0%)                   | 0/11<br>(0.0%)    | 0/11<br>(0.0%)                 | 1/11<br>(9.1%)                 | 0/11<br>(0.0%)                    | 1/11<br>(9.1%)                     | 0/11<br>(0.0%)                  |
| 6. CTCs expressing different $\beta$ -subunits with at least one potential heterodimer, n=38                 | 0/38<br>(0.0%)                 | 0/38<br>(0.0%)                    | 4/38<br>(10.5%)       | 0/38<br>(0.0%)   | 0/38<br>(0.0%)  | 0/38<br>(0.0%)                 | 0/38<br>(0.0%)                   | 0/38<br>(0.0%)                   | 1/38<br>(2.6%)    | 0/38<br>(0.0%)                 | 9/38<br>(23.7%)                | 0/38<br>(0.0%)                    | 14/38<br>(36.8%)<br><b>p=0.034</b> | 0/38<br>(0.0%)                  |
| 7. CTCs expressing $\beta$ 4-subunit along with other subunits or heterodimer, n=3                           | 0/3<br>(0.0%)                  | 1/3<br>(33.3%)<br><b>p=0.017</b>  | 0/3<br>(0.0%)         | 0/3<br>(0.0%)    | 0/3<br>(0.0%)   | 0/3<br>(0.0%)                  | 0/3<br>(0.0%)                    | 1/3<br>(33.3%)<br><b>p=0.038</b> | 1/3<br>(33.3%)    | 0/3<br>(0.0%)                  | 1/3<br>(33.3%)                 | 1/3<br>(33.3%)                    | 2/3<br>(66.6%)                     | 0/3<br>(0.0%)                   |
| 8. CTCs expressing genes of full-fledged integrin $\alpha$ 6 $\beta$ 4, n=5                                  | 1/5<br>(20%)<br><b>p=0.027</b> | 1/5<br>(20%)<br><b>p=0.027</b>    | 1/5<br>(20%)          | 0/5<br>(0%)      | 0/5<br>(0.0%)   | 3/5<br>(60%)<br><b>p=0.033</b> | 0/5<br>(0.0%)                    | 2/5<br>(40%)<br><b>p=0.002</b>   | 0/5<br>(0.0%)     | 1/5<br>(20%)<br><b>p=0.027</b> | 5/5<br>(100%)<br><b>p=0.01</b> | 4/5<br>(80%)<br><b>p&lt;0.001</b> | 2/5<br>(40%)                       | 1/5<br>(10.0%)<br><b>p=0.06</b> |
| 9. CTCs without integrins subunits gene expression, n=154                                                    | 0/154<br>(0.0%)                | 0/154<br>(0.0%)                   | 20/154<br>(13.0%)     | 1/154<br>(0.65%) | 0/154<br>(0.0%) | 2/154<br>(1.3%)                | 0/154<br>(0.0%)                  | 1/154<br>(0.65%)                 | 20/154<br>(13.0%) | 0/154<br>(0.0%)                | 61/154<br>(39.6%)              | 6/154<br>(3.9%)                   | 31/154<br>(20.1%)                  | 1/154<br>(0.65%)                |

\*Note: The table shows significant differences compared to the CTCs without integrins gene expression (group 9).

Supplementary Table 3. Gene expression of laminin subunits in CTCs of breast cancer patients

|                                                                                                              | <i>LAMA4</i>                          | <i>LAMA5</i>                     | <i>LAMB1</i>                         | <i>LAMB2</i>                        | <i>LAMB3</i>                     | <i>LAMC1</i>                        |
|--------------------------------------------------------------------------------------------------------------|---------------------------------------|----------------------------------|--------------------------------------|-------------------------------------|----------------------------------|-------------------------------------|
| 1. CTCs expressing isolated integrin subunits, n=143                                                         | 0/143<br>(0.0%)                       | 1/143<br>(0.0%)                  | 1/143<br>(0.0%)                      | 0/143<br>(0.0%)                     | 1/143<br>(0.0%)                  | 0/143<br>(0.0%)                     |
| 2. CTCs expressing isolated integrin $\alpha$ -subunits, n=81                                                | 0/81<br>(0.0%)                        | 1/81<br>(1.2%)                   | 2/81<br>(2.4%)                       | 0/81<br>(0.0%)                      | 0/81<br>(0.0%)                   | 2/81<br>(2.4%)                      |
| 3. CTCs expressing different heterodimers containing $\beta$ 1-subunit without other $\beta$ -subunits, n=8  | 0/8<br>(0.0%)                         | 1/8<br>(0.0%)                    | 1/8<br>(0.0%)                        | 0/8<br>(0.0%)                       | 0/8<br>(0.0%)                    | 1/8<br>(12.5%)                      |
| 4. CTCs expressing different heterodimers containing $\beta$ 2-subunit without other $\beta$ -subunits, n=2  | 0/2<br>(0.0%)                         | 0/2<br>(0.0%)                    | 0/2<br>(0.0%)                        | 0/2<br>(0.0%)                       | 0/2<br>(0.0%)                    | 0/2<br>(0.0%)                       |
| 5. CTCs expressing different heterodimers containing $\beta$ 3-subunit without other $\beta$ -subunits, n=11 | 0/11<br>(0.0%)                        | 0/11<br>(0.0%)                   | 0/11<br>(0.0%)                       | 0/11<br>(0.0%)                      | 0/11<br>(0.0%)                   | 0/11<br>(0.0%)                      |
| 6. CTCs expressing different $\beta$ -subunits with at least one potential heterodimer, n=38                 | 0/38<br>(0.0%)                        | 0/38<br>(0.0%)                   | 1/38<br>(0.0%)                       | 0/38<br>(0.0%)                      | 0/38<br>(0.0%)                   | 0/38<br>(0.0%)                      |
| 7. CTCs expressing $\beta$ 4-subunit along with other subunits or heterodimer, n=3                           | 0/3<br>(0.0%)                         | 0/3<br>(0.0%)                    | 0/3<br>(0.0%)                        | 0/3<br>(0.0%)                       | 0/3<br>(0.0%)                    | 0/3<br>(0.0%)                       |
| 8. CTCs expressing genes of full-fledged integrin $\alpha$ 6 $\beta$ 4, n=5                                  | 5/5<br>(100.0%)<br><b>p&lt;0.001*</b> | 1/5<br>(20.0%)<br><b>p=0.028</b> | 5/5<br>(100.0%)<br><b>p&lt;0.001</b> | 3/5<br>(60.0%)<br><b>p&lt;0.001</b> | 1/5<br>(20.0%)<br><b>p=0.028</b> | 4/5<br>(80.0%)<br><b>p&lt;0.001</b> |
| 9. CTCs without integrins subunits gene expression, n=154                                                    | 0/154<br>(0.0%)                       | 0/154<br>(0.0%)                  | 0/154<br>(0.0%)                      | 0/154<br>(0.0%)                     | 0/154<br>(0.0%)                  | 1/154<br>(0.6%)                     |

\*Note: The table shows significant differences compared to the CTCs without integrins gene expression (group 9).

Supplementary Table 4. Gene expression of chemokines/their receptors and inflammatory factors in CTCs of breast cancer patients

|                                                                                                              | <i>TGFB1</i>                            | <i>VEGFA</i>                        | <i>CCL2</i>                         | <i>CXCR7/<br/>ACKR3</i>              | <i>IL1B</i>                      | <i>CXCL8/<br/>IL8</i>               | <i>IL18</i>                       | <i>IL6</i>                       | <i>CASP1</i>                     | <i>NLRP3</i>                     | <i>ASC/<br/>PYCARD</i> |
|--------------------------------------------------------------------------------------------------------------|-----------------------------------------|-------------------------------------|-------------------------------------|--------------------------------------|----------------------------------|-------------------------------------|-----------------------------------|----------------------------------|----------------------------------|----------------------------------|------------------------|
| 1. CTCs expressing isolated integrin subunits, n=143                                                         | 72/143<br>(50.3%)<br><b>p&lt;0.001*</b> | 1/143<br>(0.7%)                     | 0/143<br>(0.0%)                     | 0/143<br>(0.0%)                      | 5/143<br>(3.5%)                  | 3/143<br>(2.1%)                     | 7/143<br>(4.9%)<br><b>p=0.005</b> | 0/143<br>(0.0%)                  | 2/143<br>(1.4%)                  | 1/143<br>(0.7%)                  | 21/143<br>(14.7%)      |
| 2. CTCs expressing isolated integrin $\alpha$ -subunits, n=81                                                | 28/81<br>(34.6%)<br><b>p=0.015</b>      | 0/81<br>(0.0%)                      | 0/81<br>(0.0%)                      | 0/81<br>(0.0%)                       | 3/81<br>(3.7%)                   | 2/81<br>(2.5%)                      | 5/81<br>(6.2%)                    | 0/81<br>(0.0%)                   | 1/81<br>(1.2%)                   | 2/81<br>(2.4%)                   | 11/81<br>(13.6%)       |
| 3. CTCs expressing different heterodimers containing $\beta$ 1-subunit without other $\beta$ -subunits, n=8  | 3/8<br>(37.5%)                          | 0/8<br>(0.0%)                       | 0/8<br>(0.0%)                       | 0/8<br>(0.0%)                        | 0/8<br>(0.0%)                    | 0/8<br>(0.0%)                       | 0/8<br>(0.0%)                     | 0/8<br>(0.0%)                    | 0/8<br>(0.0%)                    | 0/8<br>(0.0%)                    | 1/8<br>(12.5%)         |
| 4. CTCs expressing different heterodimers containing $\beta$ 2-subunit without other $\beta$ -subunits, n=2  | 0/2<br>(0.0%)                           | 1/2<br>(0.0%)                       | 0/2<br>(0.0%)                       | 0/2<br>(0.0%)                        | 1/2<br>(50.0%)<br><b>p=0.022</b> | 1/2<br>(50.0%)<br><b>p=0.022</b>    | 0/2<br>(0.0%)                     | 1/2<br>(50.0%)<br><b>p=0.022</b> | 0/2<br>(0.0%)                    | 1/2<br>(50.0%)<br><b>p=0.022</b> | 0/2<br>(0.0%)          |
| 5. CTCs expressing different heterodimers containing $\beta$ 3-subunit without other $\beta$ -subunits, n=11 | 8/11<br>(72.7%)<br><b>p=0.006</b>       | 0/11<br>(0.0%)                      | 0/11<br>(0.0%)                      | 0/11<br>(0.0%)                       | 0/11<br>(0.0%)                   | 0/11<br>(0.0%)                      | 0/11<br>(0.0%)                    | 0/11<br>(0.0%)                   | 0/11<br>(0.0%)                   | 0/11<br>(0.0%)                   | 0/11<br>(0.0%)         |
| 6. CTCs expressing different $\beta$ -subunits with at least one potential heterodimer, n=38                 | 35/38<br>(92.1%)<br><b>p&lt;0.001</b>   | 1/38<br>(2.6%)                      | 0/38<br>(0.0%)                      | 0/38<br>(0.0%)                       | 1/38<br>(2.6%)                   | 2/38<br>(5.2%)<br><b>p&lt;0.001</b> | 1/38<br>(2.6%)                    | 0/38<br>(0.0%)                   | 0/38<br>(0.0%)                   | 0/38<br>(0.0%)                   | 2/38<br>(5.2%)         |
| 7. CTCs expressing $\beta$ 4-subunit along with other subunits or heterodimer, n=3                           | 1/3<br>(33.3%)                          | 1/3<br>(33.3%)<br><b>p=0.038</b>    | 0/3<br>(0.0%)                       | 0/3<br>(0.0%)                        | 0/3<br>(0.0%)                    | 0/3<br>(0.0%)                       | 0/3<br>(0.0%)                     | 0/3<br>(0.0%)                    | 0/3<br>(0.0%)                    | 0/3<br>(0.0%)                    | 1/3<br>(33.3%)         |
| 8. CTCs expressing genes of full-fledged integrin $\alpha$ 6 $\beta$ 4, n=5                                  | 5/5<br>(100.0%)<br><b>p=0.003</b>       | 3/5<br>(60.0%)<br><b>p&lt;0.001</b> | 2/5<br>(40.0%)<br><b>p&lt;0.001</b> | 5/5<br>(100.0%)<br><b>p&lt;0.001</b> | 0/5<br>(0.0%)                    | 1/5<br>(20.0%)<br><b>p=0.054</b>    | 0/5<br>(0.0%)                     | 1/5<br>(20.0%)<br><b>p=0.028</b> | 1/5<br>(20.0%)<br><b>p=0.028</b> | 0/5<br>(0.0%)                    | 1/5<br>(20.0%)         |
| 9. CTCs without integrins subunits gene expression, n=154                                                    | 46/154<br>(29.9%)                       | 1/154<br>(0.6%)                     | 0/154<br>(0.0%)                     | 0/154<br>(0.0%)                      | 1/154<br>(0.6%)                  | 1/154<br>(0.6%)                     | 0/154<br>(0.0%)                   | 0/154<br>(0.0%)                  | 0/154<br>(0.0%)                  | 0/154<br>(0.0%)                  | 16/154<br>(9.0%)       |

\*Note: The table shows significant differences compared to the CTCs without integrins gene expression (group 9).

Supplementary Table 5. Gene expression of invasion markers in CTCs of breast cancer patients

|                                                                                                              | <i>RAC1</i>                            | <i>RHOC</i>                          | <i>ROCK1</i>                       | <i>MMP1</i>                      | <i>MMP2</i>                          |
|--------------------------------------------------------------------------------------------------------------|----------------------------------------|--------------------------------------|------------------------------------|----------------------------------|--------------------------------------|
| 1. CTCs expressing isolated integrin subunits, n=143                                                         | 53/143<br>(37.0%)                      | 15/143<br>(10.5%)                    | 20/143<br>(14.0%)                  | 0/143<br>(0.0%)                  | 0/143<br>(0.0%)                      |
| 2. CTCs expressing isolated integrin $\alpha$ -subunits, n=81                                                | 25/81<br>(30.9%)                       | 7/81<br>(8.6%)                       | 17/81<br>(21.0%)<br><b>p=0.020</b> | 0/81<br>(0.0%)                   | 0/81<br>(0.0%)                       |
| 3. CTCs expressing different heterodimers containing $\beta$ 1-subunit without other $\beta$ -subunits, n=8  | 2/8<br>(25.0%)                         | 1/8<br>(12.5%)                       | 1/8<br>(12.5%)                     | 0/8<br>(0.0%)                    | 0/8<br>(0.0%)                        |
| 4. CTCs expressing different heterodimers containing $\beta$ 2-subunit without other $\beta$ -subunits, n=2  | 1/2<br>(50.0%)                         | 0/2<br>(0.0%)                        | 1/2<br>(50.0%)                     | 0/2<br>(0.0%)                    | 0/2<br>(0.0%)                        |
| 5. CTCs expressing different heterodimers containing $\beta$ 3-subunit without other $\beta$ -subunits, n=11 | 6/11<br>(54.5%)                        | 0/11<br>(0.0%)                       | 0/11<br>(0.0%)                     | 0/11<br>(0.0%)                   | 0/11<br>(0.0%)                       |
| 6. CTCs expressing different $\beta$ -subunits with at least one potential heterodimer, n=38                 | 27/38<br>(71.1%)<br><b>p&lt;0.001*</b> | 12/38<br>(31.6%)<br><b>p=0.001</b>   | 10/38<br>(26.3%)<br><b>p=0.013</b> | 0/38<br>(0.0%)                   | 0/38<br>(0.0%)                       |
| 7. CTCs expressing $\beta$ 4-subunit along with other subunits or heterodimer, n=3                           | 1/3<br>(33.3%)                         | 0/3<br>(0.0%)                        | 2/3<br>(66.7%)<br><b>p=0.027</b>   | 0/3<br>(0.0%)                    | 0/3<br>(0.0%)                        |
| 8. CTCs expressing genes of full-fledged integrin $\alpha$ 6 $\beta$ 4, n=5                                  | 5/5<br>(100.0%)<br><b>p=0.002</b>      | 5/5<br>(100.0%)<br><b>p&lt;0.001</b> | 4/5<br>(80.0%)<br><b>p=0.001</b>   | 1/5<br>(20.0%)<br><b>p=0.028</b> | 5/5<br>(100.0%)<br><b>p&lt;0.001</b> |
| 9. CTCs without integrins subunits gene expression, n=154                                                    | 45/154<br>(29.2%)                      | 15/154<br>(9.7%)                     | 15/154<br>(9.7%)                   | 0/154<br>(0.0%)                  | 0/154<br>(0.0%)                      |

\*Note: The table shows significant differences compared to the CTCs without integrins gene expression (group 9).

Supplementary Table 6. Gene expression of epithelial markers in CTCs of breast cancer patients

|                                                                                                              | <i>EPCAM</i>    | <i>KRT10</i>                      | <i>KRT5</i>                      | <i>KRT8</i>                        | <i>KRT7</i>     | <i>KRT18</i>                         | <i>KRT19</i>                     | <i>MUC1</i>     | <i>CDH1</i>       | <i>ERBB2</i>                     |
|--------------------------------------------------------------------------------------------------------------|-----------------|-----------------------------------|----------------------------------|------------------------------------|-----------------|--------------------------------------|----------------------------------|-----------------|-------------------|----------------------------------|
| 1. CTCs expressing isolated integrin subunits, n=143                                                         | 1/143<br>(0.7%) | 15/143<br>(10.5%)                 | 42/143<br>(29.4%)                | 55/143<br>(38.5%)                  | 0/143<br>(0.0%) | 30/143<br>(21.0)                     | 1/143<br>(0.7%)                  | 2/143<br>(1.4%) | 16/143<br>(11.2%) | 0/166<br>(0.0%)                  |
| 2. CTCs expressing isolated integrin $\alpha$ -subunits, n=81                                                | 5/81<br>(6.2%)  | 17/81<br>(21.0%)                  | 37/81<br>(45.7%)                 | 19/81<br>(23.4%)                   | 1/81<br>(1.2%)  | 14/81<br>(17.3%)                     | 0/81<br>(0.0%)                   | 3/81<br>(3.7%)  | 7/81<br>(8.6%)    | 0/81<br>(0.0%)                   |
| 3. CTCs expressing different heterodimers containing $\beta$ 1-subunit without other $\beta$ -subunits, n=8  | 1/8<br>(12.5%)  | 1/8<br>(12.5%)                    | 3/8<br>(37.5%)                   | 2/8<br>(25.0%)                     | 0/8<br>(0.0%)   | 2/8<br>(25.0%)                       | 0/8<br>(0.0%)                    | 1/8<br>(12.5%)  | 1/8<br>(12.5%)    | 1/8<br>(12.5%)<br><b>p=0.049</b> |
| 4. CTCs expressing different heterodimers containing $\beta$ 2-subunit without other $\beta$ -subunits, n=2  | 0/2<br>(0.0%)   | 0/2<br>(0.0%)                     | 0/2<br>(0.0%)                    | 0/2<br>(0.0%)                      | 1/2<br>(50.0%)  | 0/2<br>(0.0%)                        | 0/2<br>(0.0%)                    | 0/2<br>(0.0%)   | 1/2<br>(50.0%)    | 0/2<br>(0.0%)                    |
| 5. CTCs expressing different heterodimers containing $\beta$ 3-subunit without other $\beta$ -subunits, n=11 | 0/11<br>(0.0%)  | 0/11<br>(0.0%)                    | 0/11<br>(0.0%)                   | 7/11<br>(63.6%)<br><b>p=0.005</b>  | 0/11<br>(0.0%)  | 4/11<br>(36.4%)                      | 0/11<br>(0.0%)                   | 0/11<br>(0.0%)  | 0/11<br>(0.0%)    | 0/11<br>(0.0%)                   |
| 6. CTCs expressing different $\beta$ -subunits with at least one potential heterodimer, n=38                 | 0/38<br>(0.0%)  | 2/38<br>(5.3%)                    | 5/38<br>(5.3%)<br><b>p=0.001</b> | 18/38<br>(47.4%)<br><b>p=0.004</b> | 0/38<br>(0.0%)  | 15/38<br>(39.5%)<br><b>p=0.017</b>   | 0/38<br>(0.0%)                   | 0/38<br>(0.0%)  | 1/38<br>(2.6%)    | 0/38<br>(0.0%)                   |
| 7. CTCs expressing $\beta$ 4-subunit along with other subunits or heterodimer, n=3                           | 1/3<br>(33.3%)  | 1/3<br>(33.3%)                    | 1/3<br>(33.3%)                   | 0/3<br>(0.0%)                      | 0/3<br>(0.0%)   | 0/3<br>(0.0%)                        | 0/3<br>(0.0%)                    | 0/3<br>(0.0%)   | 1/3<br>(33.3%)    | 0/3<br>(0.0%)                    |
| 8. CTCs expressing genes of full-fledged integrin $\alpha$ 6 $\beta$ 4, n=5                                  | 0/5<br>(0.6%)   | 3/5<br>(60.0%)<br><b>p=0.013*</b> | 0/5<br>(0.0%)                    | 3/5<br>(60.0%)                     | 0/5<br>(0.0%)   | 5/5<br>(100.0%)<br><b>p&lt;0.001</b> | 2/5<br>(40.0%)<br><b>p=0.011</b> | 0/5<br>(0.0%)   | 0/5<br>(0.0%)     | 0/5<br>(0.0%)                    |
| 9. CTCs without integrins subunits gene expression, n=154                                                    | 4/154<br>(2.6%) | 16/154<br>(10.4%)                 | 70/154<br>(45.5%)                | 34/154<br>(22.1%)                  | 1/154<br>(0.6%) | 30/154<br>(19.5%)                    | 4/154<br>(2.6%)                  | 2/154<br>(1.2%) | 20/154<br>(13.0%) | 0/154<br>(0.0%)                  |

\*Note: The table shows significant differences compared to the CTCs without integrins gene expression (group 9).
